# Supplementary material for: Electronic Cigarette Usage Patterns and Perceptions in Adult Australians
Source: MDPI journal article supplement (doi:10.3390/toxics11030290), 2023-03-21
Supplement: s1 [file s1]

**Table S1.** Devices, settings and e-liquid preferences. Numbers in bold indicate significantly greater than expected compared with current or former user.

|                                               | Total Sample<br>(n=505)<br>n (%) | Current<br>e-cigarette user<br>(n=307)<br>n (%) | Former<br>e-cigarette user<br>(n=198)<br>n (%) | Significance |
|-----------------------------------------------|----------------------------------|-------------------------------------------------|------------------------------------------------|--------------|
| What type of device do you use the most?      |                                  |                                                 |                                                |              |
| Cig-a-like                                    | 85 (16.8)                        | 35 (11.4)                                       | 50 (25.3)                                      | p < 0.001    |
| Vape-pen                                      | 190 (37.6)                       | 114 (37.1)                                      | 76 (38.4)                                      |              |
| Tank/vape mod                                 | 178 (35.2)                       | 119 (38.8)                                      | 59 (29.8)                                      |              |
| JUUL/cartridge type device                    | 52 (10.3)                        | 39 (12.7)                                       | 13 (6.6)                                       |              |
| Is your device “sub-ohm”?                     |                                  |                                                 |                                                |              |
| Yes                                           | 185 (36.6)                       | 154 (50.2)                                      | 31 (15.7)                                      | p < 0.001    |
| No                                            | 44 (8.7)                         | 29 (9.4)                                        | 15 (7.6)                                       | p < 0.001    |
| Don’t know                                    | 276 (54.7)                       | 124 (40.4)                                      | 152 (76.8)                                     |              |
| Do you adjust the settings?                   |                                  |                                                 |                                                |              |
| Yes                                           | 229 (45.3)                       | 169 (55.0)                                      | 60 (30.3)                                      | p < 0.001    |
| No                                            | 220 (43.6)                       | 113 (36.8)                                      | 107 (54.0)                                     | p < 0.001    |
| Don’t know                                    | 56 (11.1)                        | 25 (8.1)                                        | 31 (15.7)                                      |              |
| Where do you buy your devices and liquids?    |                                  |                                                 |                                                |              |
| Physical store in Australia                   | 240 (47.5)                       | 160 (52.1)                                      | 80 (40.4)                                      | p < 0.001    |
| Physical store overseas                       | 29 (5.7)                         | 18 (5.9)                                        | 11 (5.6)                                       |              |
| Online from an Australian supplier            | 92 (18.2)                        | 58 (18.9)                                       | 34 (17.2)                                      |              |
| Online from an overseas supplier              | 91 (18.0)                        | 54 (17.6)                                       | 37 (18.7)                                      |              |
| I don’t know, I didn’t buy it                 | 49 (9.7)                         | 16 (5.2)                                        | 33 (16.7)                                      |              |
| I don’t know                                  | 4 (0.8)                          | 1 (0.3)                                         | 3 (1.5)                                        |              |
|                                               |                                  |                                                 |                                                |              |
| What is your preferred nicotine level?        |                                  |                                                 |                                                |              |
| 0mg/mL (no nicotine)                          | 90 (17.8)                        | 45 (14.7)                                       | 45 (22.7)                                      | p < 0.001    |
| Less than 6mg/mL (0.6% but not nicotine free) | 139 (27.5)                       | 90 (29.3)                                       | 49 (24.7)                                      |              |
| 7 - 11 mg/mL (0.7 – 1.1%)                     | 130 (25.7)                       | 88 (28.7)                                       | 42 (21.2)                                      |              |
| 12 – 19 mg/mL (1.2 – 1.9%)                    | 60 (11.9)                        | 42 (13.7)                                       | 18 (9.1)                                       |              |
| 20 mg/mL or more (over 2%)                    | 26 (5.1)                         | 21 (6.8)                                        | 5 (2.5)                                        |              |
| Don’t know                                    | 60 (11.9)                        | 21 (6.8)                                        | 39 (19.7)                                      |              |
|                                               |                                  |                                                 |                                                |              |
| What flavour do you use most?                 |                                  |                                                 |                                                |              |
| Tobacco                                       | 170 (33.7)                       | 102 (33.2)                                      | 68 (34.3)                                      |              |
| Fruit                                         | 154 (30.5)                       | 105 (34.2)                                      | 49 (24.7)                                      |              |
| Menthol/mint                                  | 100 (19.8)                       | 53 (17.3)                                       | 47 (23.7)                                      |              |
| Candy                                         | 29 (5.7)                         | 15 (4.9)                                        | 14 (7.1)                                       |              |
| Desert                                        | 9 (1.8)                          | 6 (2.0)                                         | 3 (1.5)                                        |              |
| Drink/beverage                                | 13 (2.6)                         | 7 (2.3)                                         | 6 (3.0)                                        |              |
| Cinnamon                                      | 15 (3.0)                         | 11 (3.6)                                        | 4 (2.0)                                        |              |
| Un-flavoured                                  | 13 (2.6)                         | 7 (2.3)                                         | 6 (3.0)                                        |              |
| Other/don’t know                              | 2 (0.4)                          | 1 (0.3)                                         | 1 (0.5)                                        |              |
|                                               |                                  |                                                 |                                                |              |
| How many different flavours do you use?       |                                  |                                                 |                                                |              |
| 1                                             | 195 (38.6)                       | 102 (33.2)                                      | 93 (47.0)                                      | p = 0.003    |
| 2 to 3                                        | 279 (55.2)                       | 179 (58.3)                                      | 100 (50.5)                                     |              |
| 4 to 5                                        | 24 (4.8)                         | 20 (6.2)                                        | 4 (2.0)                                        |              |
| More than 5                                   | 7 (1.4)                          | 6 (2.0)                                         | 1 (0.5)                                        |              |
| Preferred PG/VG ratio                         |                                  |                                                 |                                                |              |
| Don’t know                                    | 170 (33.7)                       | 74 (24.1)                                       | 96 (48.5)                                      | p < 0.001    |
| Equal                                         | 158 (31.3)                       | 111 (36.2)                                      | 47 (23.7)                                      | p < 0.001    |
| High PG (e.g. 70PG/30VG)                      | 71 (14.1)                        | 58 (18.9)                                       | 13 (6.6)                                       | p < 0.001    |
| High VG (e.g. 30PG/70VG)                      | 23 (4.6)                         | 20 (6.5)                                        | 3 (1.5)                                        |              |
| I don’t care about the ratio                  | 83 (16.4)                        | 44 (14.3)                                       | 39 (19.7)                                      |              |

|                                       |            |                  |                   |           |
|---------------------------------------|------------|------------------|-------------------|-----------|
| <b>Do you mix your own e-liquids?</b> |            |                  |                   |           |
| Yes                                   | 110 (21.8) | <b>89 (29.0)</b> | 21 (10.6)         | p < 0.001 |
| No                                    | 395 (78.2) | 218 (71.0)       | <b>177 (89.4)</b> | p < 0.001 |
| <b>Do you use nicotine salts?</b>     |            |                  |                   |           |
| Yes                                   | 52 (10.3)  | <b>49 (16.0)</b> | 3 (1.5)           | p < 0.001 |
| No                                    | 404 (80.0) | 234 (76.2)       | <b>170 (85.9)</b> | p < 0.001 |
| Don't know                            | 49 (9.7)   | 24 (11.8)        | 25 (12.6)         |           |
